# Supplementary material for: Structural Manipulations of Marine Natural Products Inspire a New Library of 3-Amino-1,2,4-Triazine PDK Inhibitors Endowed with Antitumor Activity in Pancreatic Ductal Adenocarcinoma
Source: MDPI journal article supplement (doi:10.3390/md21050288), 2023-05-04
Supplement: s1 [file s1]

# Structural manipulations of marine natural products inspire a new library of 3-amino-1,2,4-triazine PDK inhibitors endowed with anti-tumor activity in pancreatic ductal adenocarcinoma

Daniela Carbone<sup>1</sup>, Michele De Franco<sup>2</sup>, Camilla Pecoraro<sup>1</sup>, Davide Bassani<sup>3</sup>, Matteo Pavan<sup>3</sup>, Stella Cascioferro<sup>1</sup>, Barbara Parrino<sup>1</sup>, Girolamo Cirrincione<sup>1</sup>, Stefano Dall'Acqua<sup>2</sup>, Stefania Sut<sup>2</sup>, Stefano Moro<sup>3</sup>, Valentina Gandin<sup>2\*</sup> and Patrizia Diana<sup>1\*</sup>

<sup>1</sup> Department of Biological, Chemical, and Pharmaceutical Sciences and Technologies (STEBICEF), University of Palermo, Via Archirafi 32, 90123, Palermo, Italy; daniela.carbone@unipa.it; camilla.pecoraro@unipa.it; stellamaria.cascioferro@unipa.it; barbara.parrino@unipa.it; girolamo.cirrincione@unipa.it; patrizia.diana@unipa.it

<sup>2</sup> Department of Pharmaceutical and Pharmacological Sciences, University of Padova, Via Marzolo 5, 35128, Padova, Italy; michele.defranco@studenti.unipd.it; stefano.dallacqua@unipd.it; stefania.sut@studenti.unipd.it; valentina.gandin@unipd.it

<sup>3</sup> Molecular Modeling Section (MMS), Department of Pharmaceutical and Pharmacological Sciences, University of Padova, 35131 Padova, Italy; davide.bassani.1@phd.unipd.it; matteo.pavan.7@phd.unipd.it; stefano.moro@unipd.it

\* Correspondence: patrizia.diana@unipa.it; valentina.gandin@unipd.it

---

## Content

MS spectra

## Figures

S1-S20

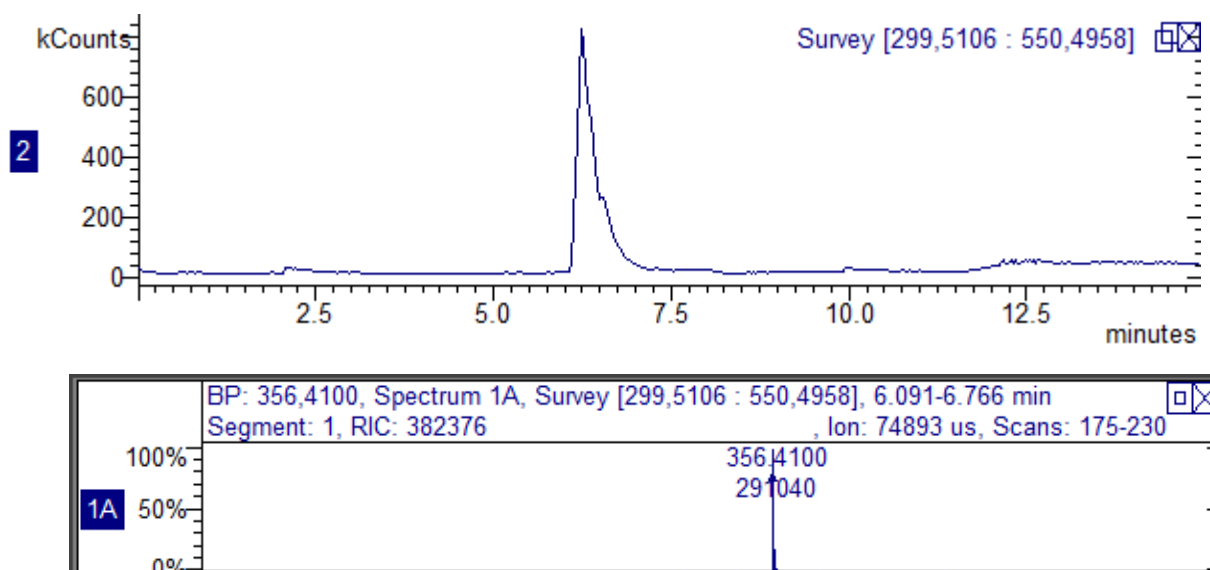

**Figure S1.** Chromatogram and MS spectrum of compound 4a.

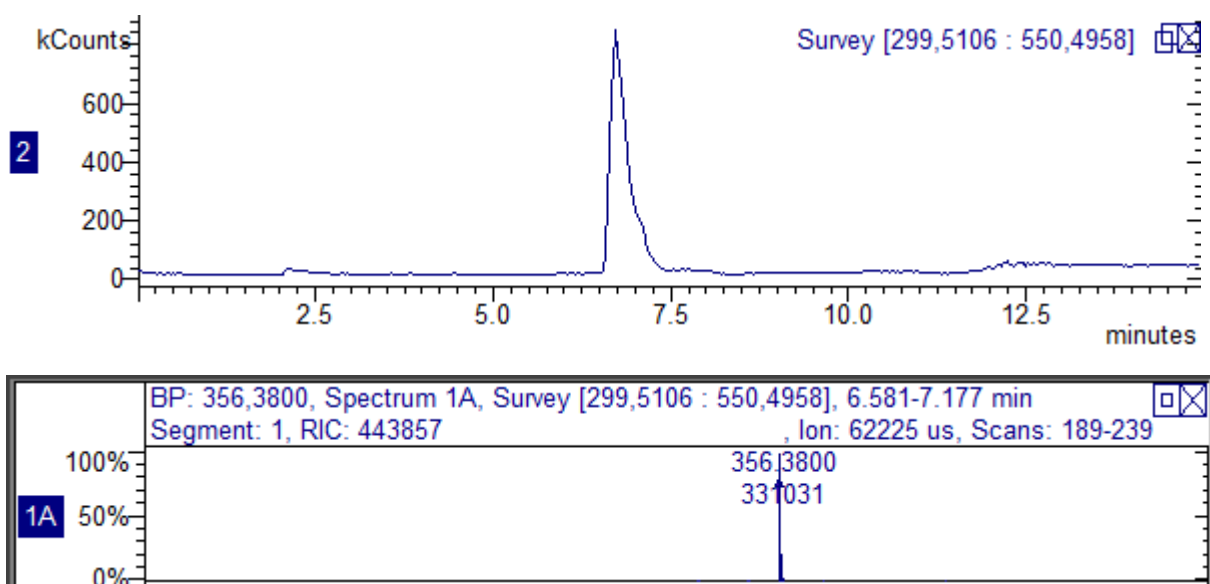

**Figure S2.** Chromatogram and MS spectrum of compound 5a.

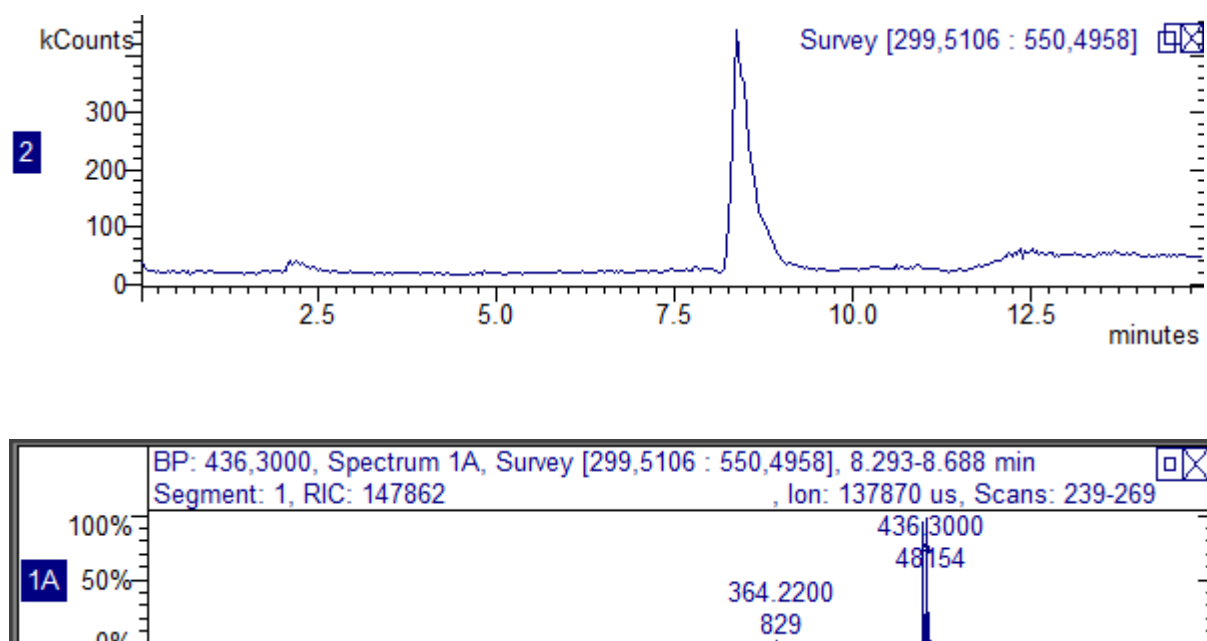

Figure S3. Chromatogram and MS spectrum of compound 4b.

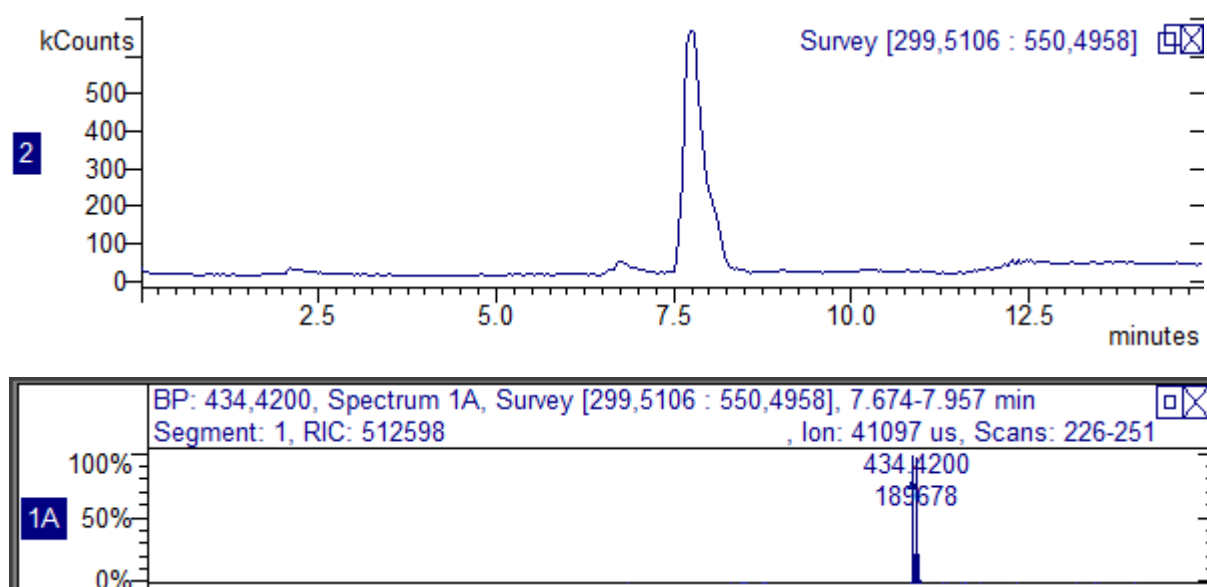

Figure S4. Chromatogram and MS spectrum of compound 5b.

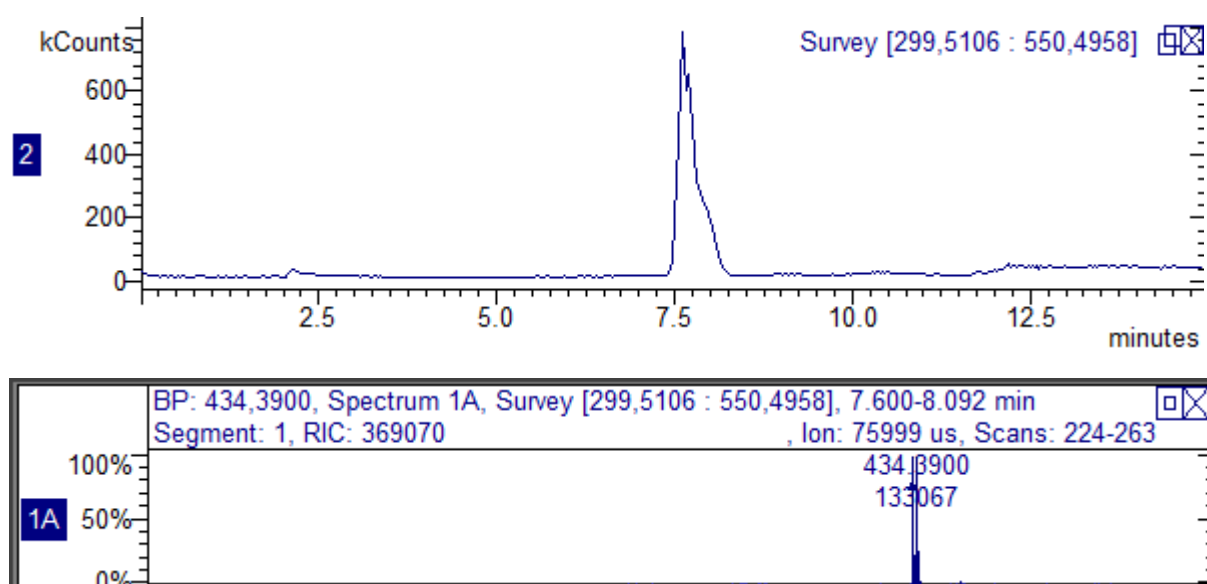

Figure S5. Chromatogram and MS spectrum of compound 4c.

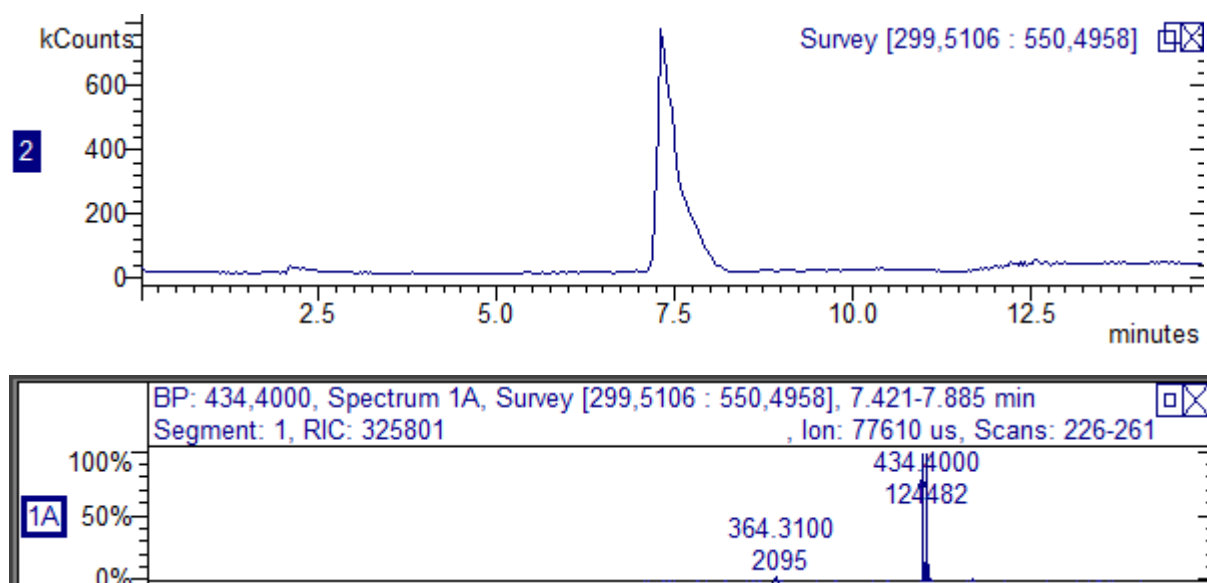

Figure S6. Chromatogram and MS spectrum of compound 5c.

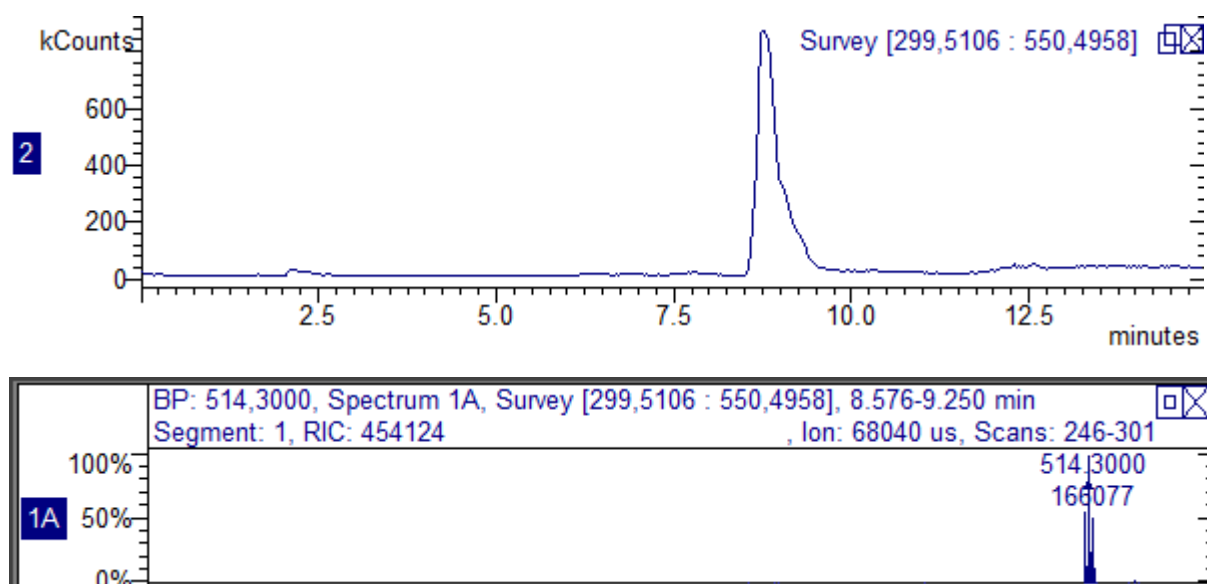

Figure S7. Chromatogram and MS spectrum of compound 4d.

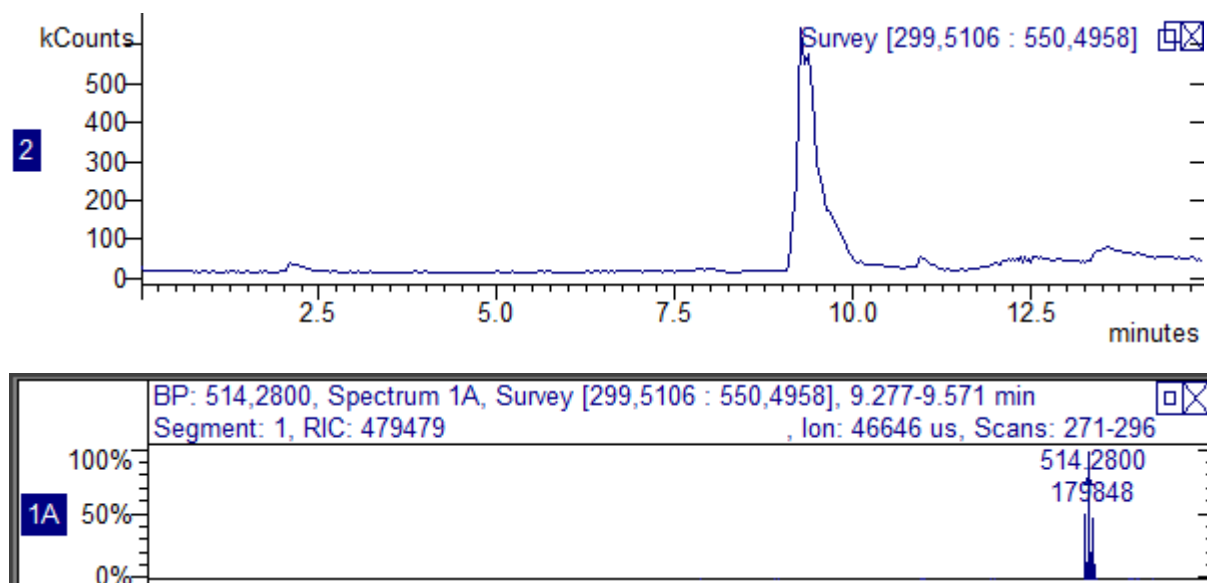

Figure S8. Chromatogram and MS spectrum of compound 5d.

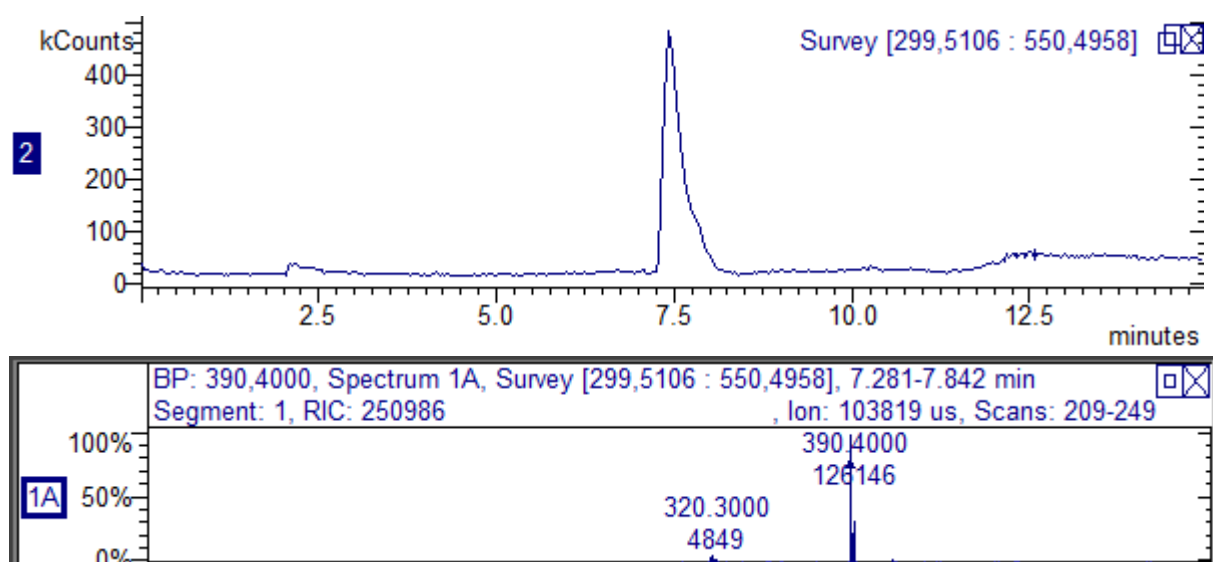

Figure S9. Chromatogram and MS spectrum of compound 4e.

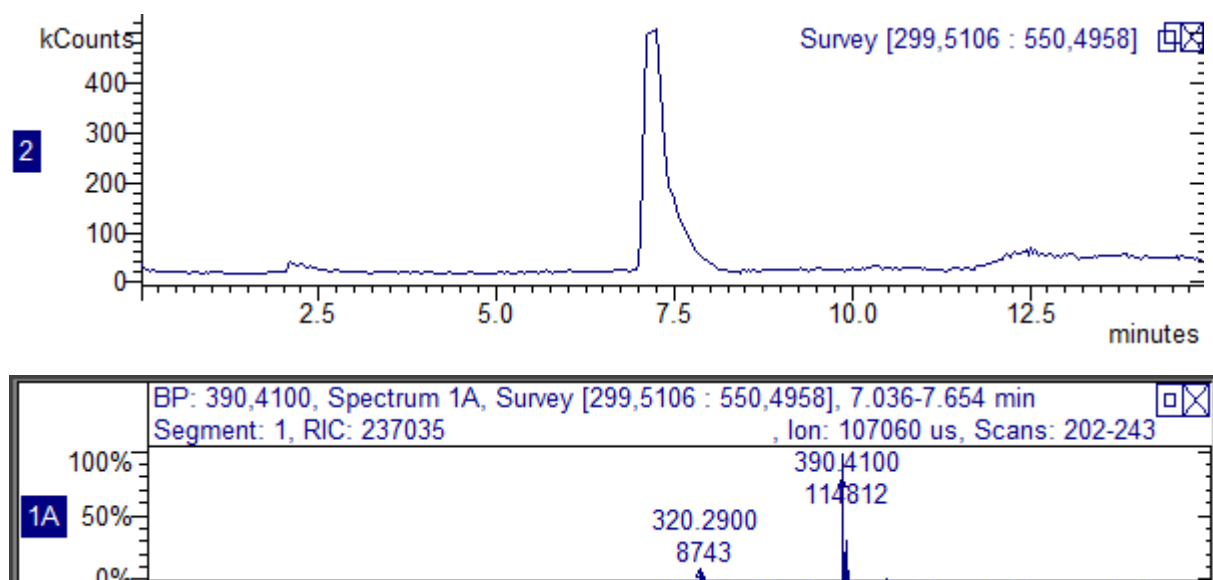

Figure S10. Chromatogram and MS spectrum of compound 5e.

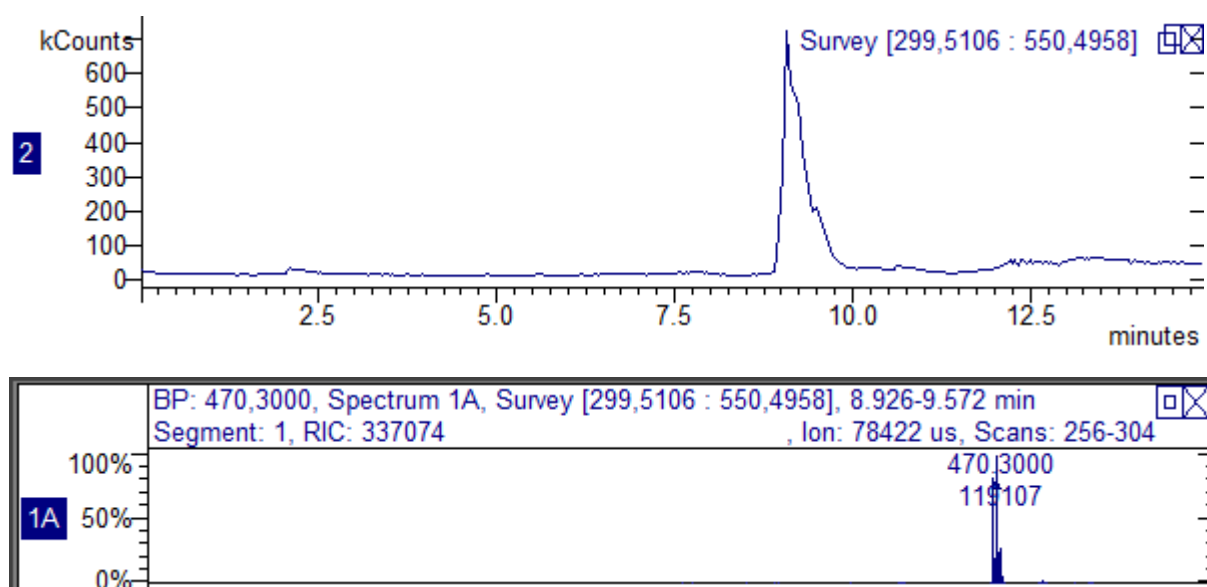

**Figure S11.** Chromatogram and MS spectrum of compound 4f.

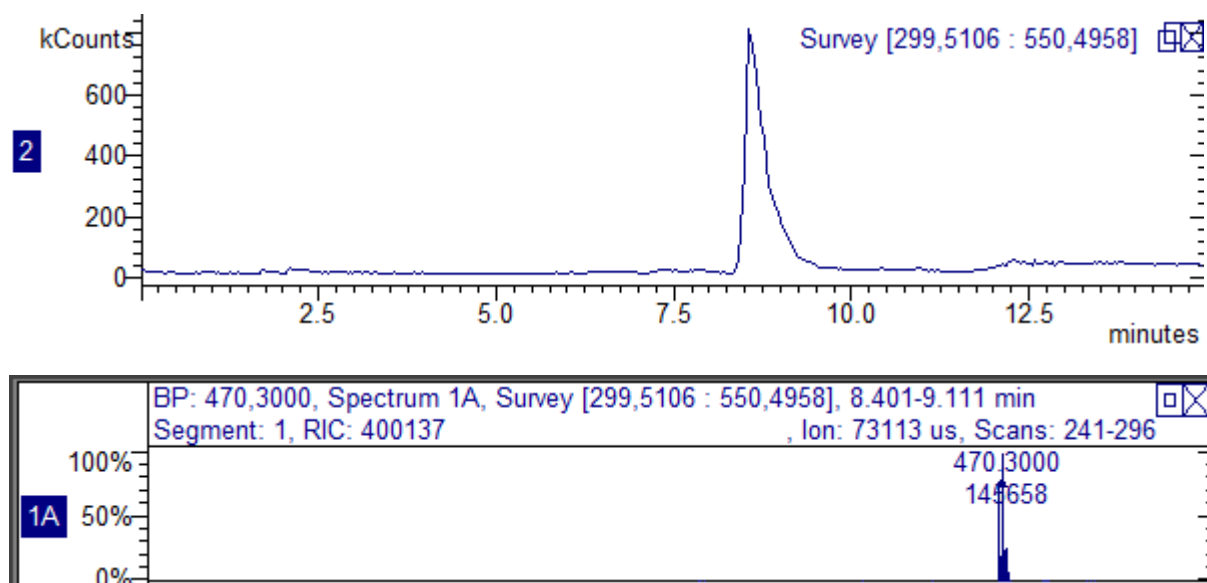

**Figure S12.** Chromatogram and MS spectrum of compound 5f.

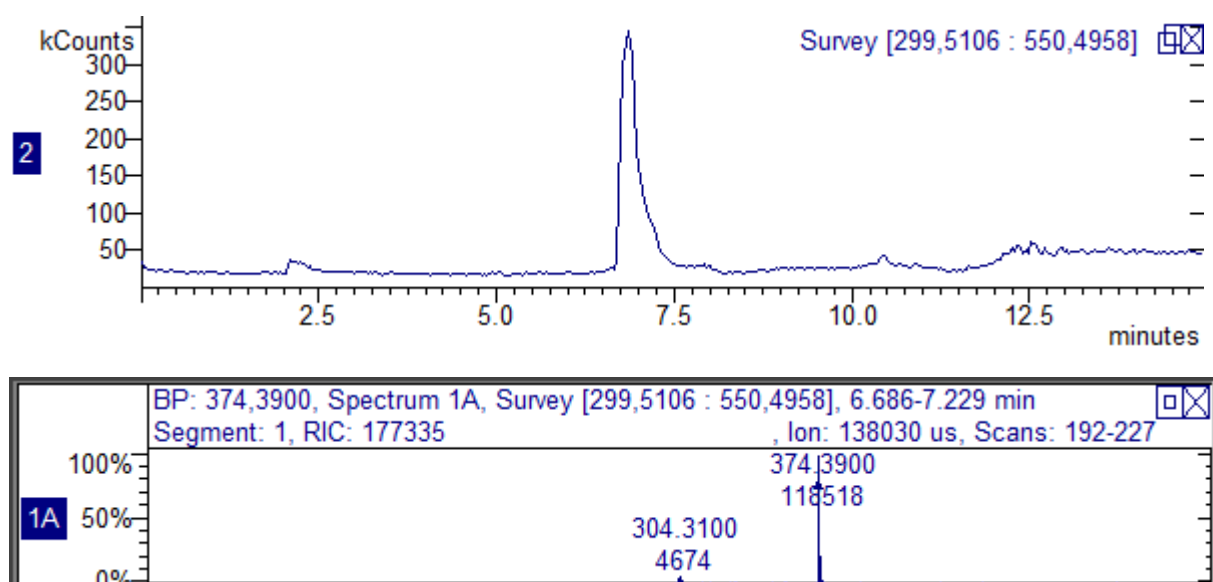

**Figure S13.** Chromatogram and MS spectrum of compound **4g**.

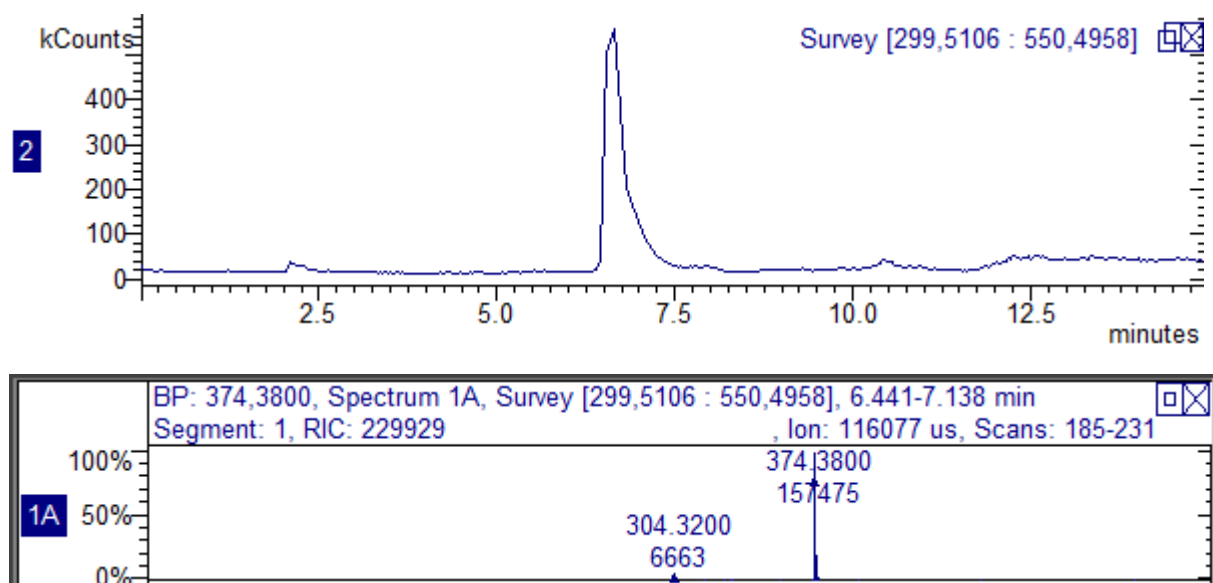

**Figure S14.** Chromatogram and MS spectrum of compound **5g**.



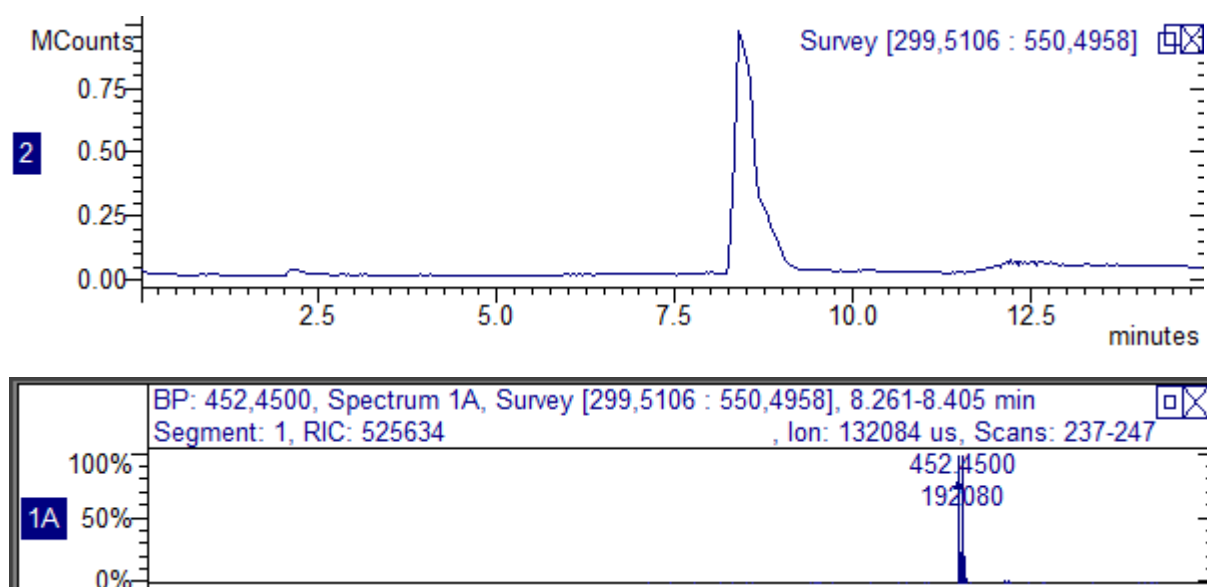

Figure S15. Chromatogram and MS spectrum of compound 4h.

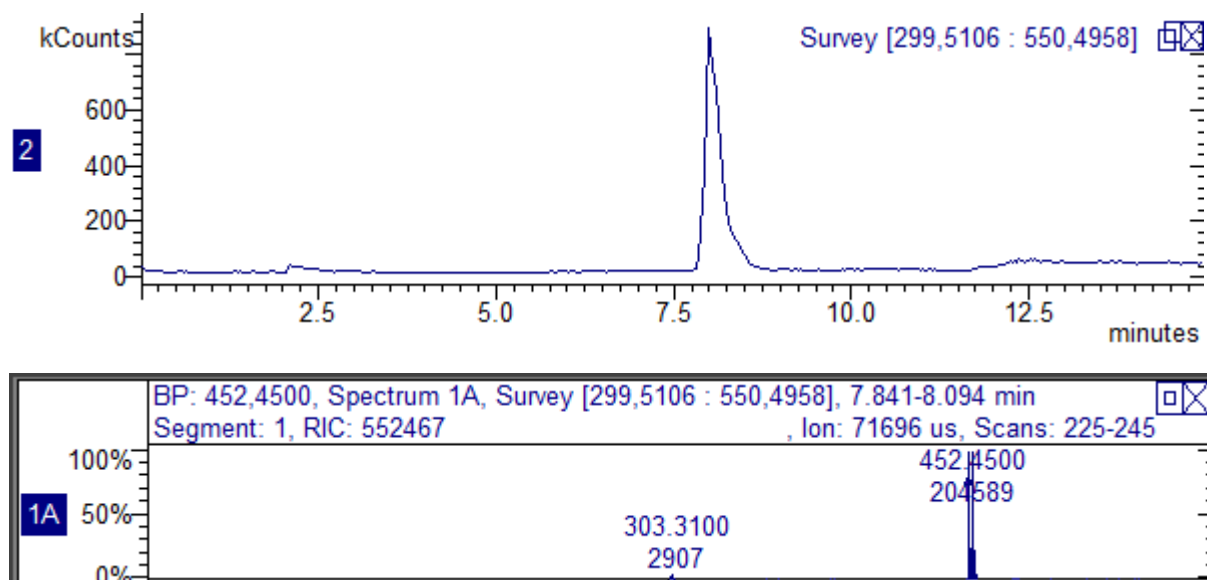

Figure S16. Chromatogram and MS spectrum of compound 5h.

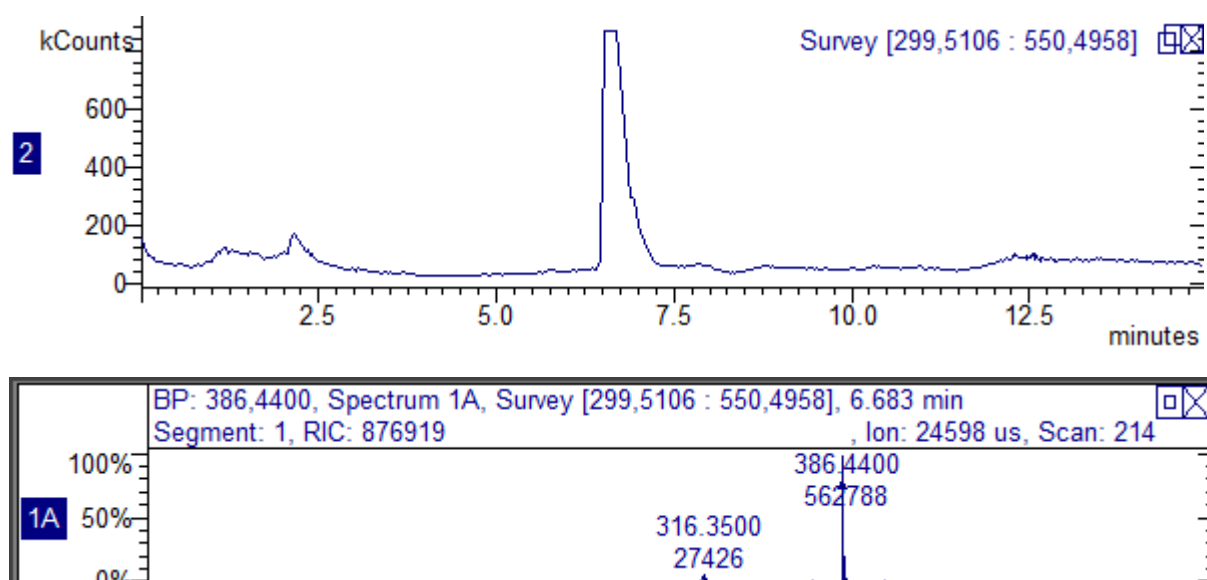

**Figure S17.** Chromatogram and MS spectrum of compound **4i**.

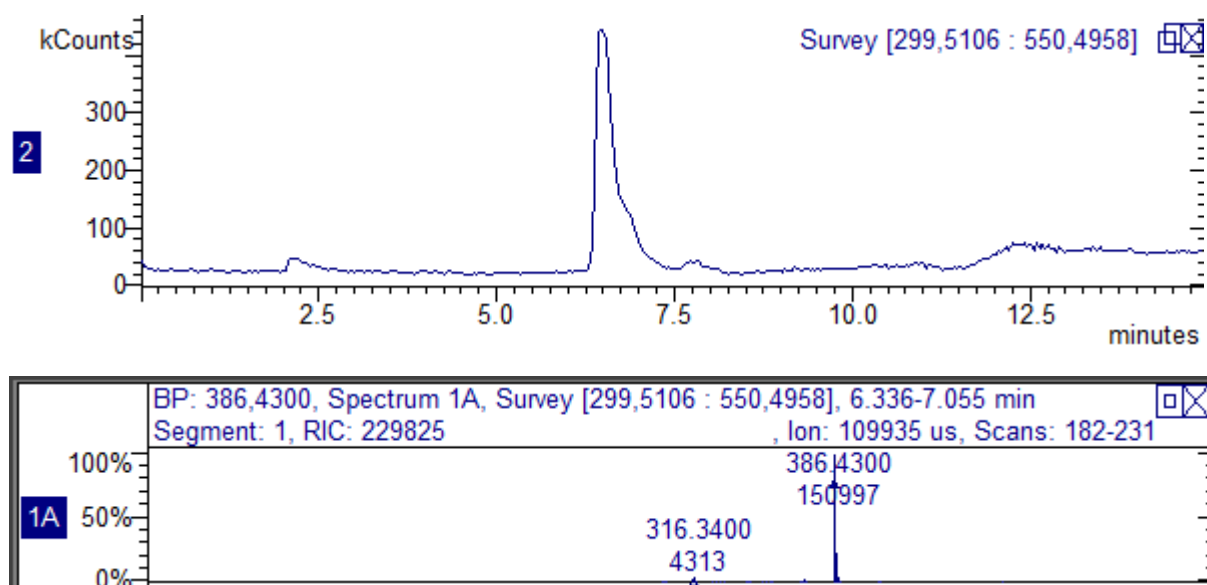

**Figure S18.** Chromatogram and MS spectrum of compound **5i**.

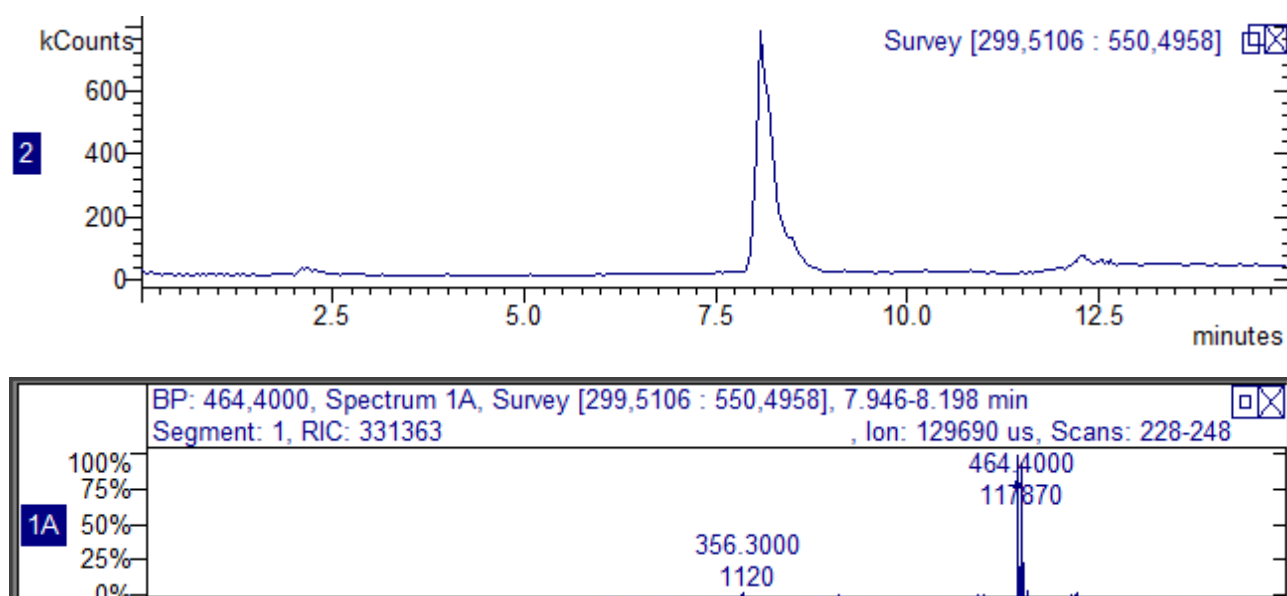

**Figure S19.** Chromatogram and MS spectrum of compound **4j**.

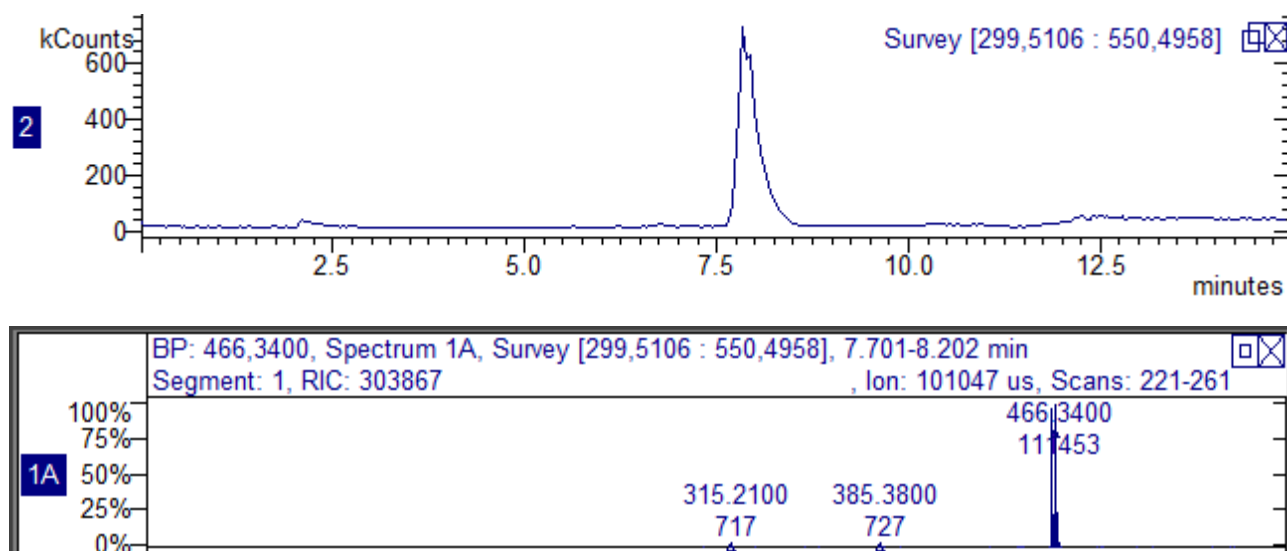

**Figure S20.** Chromatogram and MS spectrum of compound **5j**.
